# Supplementary material
Source: publisher figshare collection journal article supplement (https://sage.figshare.com/ndownloader/files/18018128)
Supplement: Supplementary file 1 [file 18018128]

Reviewer 3, v. 3

Comments for the authors:

Thank you for the opportunity to review this paper. The paper is interesting regarding the use of NHF in outpatients as a palliative care, well and compact written and provide new information to the community. But the paper would benefit from changes.

Major:

1. It is not clear why the authors present three figures regarding survival in this retrospective design. There is no control (e.g. historical) group included. For this reasons survival curves are not interesting. So far statements about survival differences between tNHF and NHF are not helpful.
2. The authors present no data about the course of measured values. These information should be presented in an own table. The reader should know all data (ABG before NHF, at discharge, after some time, exacerbation rates before,.....) in detail.

Minor:

P4L34: please cite a paper regarding WOB in adults (Biselli, Delorme,...)

P5L12: Was the study registered?

Table 1: What means mechanical ventilation. Had the patients both or were ventilated before NHF initiation?

Table 1: Its essential to know breathing rate!

P7L14: What is included in chronic airway disease?

P7L30: How do you regulated the oxygen supplementation? Was the aim to achieve the same oxygenation like before initiation of NHF? Please show the ABG data before initiation of NHF. This para should be described exactly (table).

P7L40: What means exacerbation in this context? Please describe!

P7L44: These informations are not helpful (see above).

P8L3: Explain the differences in the discussion section!

P10L18: Please write limitation because not all patients had a pulmonary disease (NMD).
